# Supplementary material for: Fanconi-BRCA pathway mutations in childhood T-cell acute lymphoblastic leukemia
Source: PubMed Central journal article supplement (PMC6853288; doi:10.1371/journal.pone.0221288), 2019-11-13

### T-ALL Genomic DNA

PDX D115  
BRCA2  
c.5127\_5131TTATG>T  
p.Y1710X

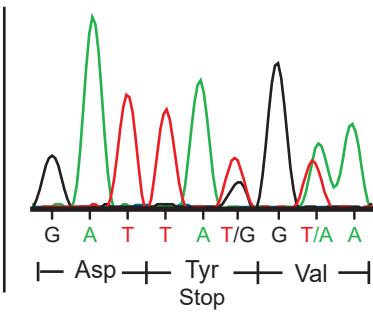

Supplement: pone.0221288.s004.pdf [file pone.0221288.s004.pdf]
