# Supplementary material for: Fanconi-BRCA pathway mutations in childhood T-cell acute lymphoblastic leukemia
Source: PubMed Central journal article supplement (PMC6853288; doi:10.1371/journal.pone.0221288), 2019-11-13

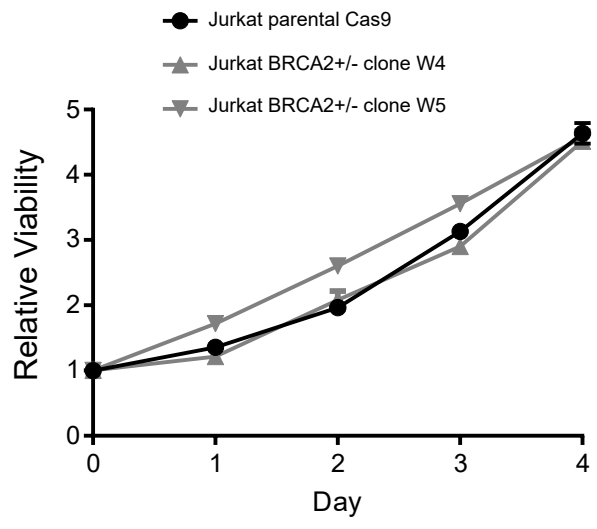

Supplement: pone.0221288.s006.pdf [file pone.0221288.s006.pdf]
